# Supplementary material for: Electron-rich heteroaroylphosphonates and their reaction with trimethyl phosphite
Source: Royal Society of Chemistry journal article supplement (doi:10.1039/b717130g), 2007-12-20
Supplement: b717130g.pdf [file b717130g.pdf]

# Electron-rich heteroaroylphosphonates and their reaction with trimethyl phosphite

D. Vaughan Griffiths,\* Mohamad J. Al-Jeboori, Yuen-Ki Cheong, Philip Duncanson, Jayne E. Harris, Michael C. Salt and Helen V. Taylor

## Supplementary Data

### Experimental

#### Additional general details

Melting points were obtained on a Buchi SMP-20 capillary melting point apparatus and are uncorrected. IR spectra were taken on a Shimadzu FTIR-8300 instrument. Low resolution mass spectra were recorded on a ES Bruker Esquire 300 Plus Daltronics instrument with ES ionisation whilst most high resolution mass spectra were obtained from the mass spectrometry facility at Kings College, London. TLC was performed with alumina backed silica gel 60 F<sub>254</sub> eluting with the solvent system used for the column chromatography unless otherwise stated and the plates were visualised under UV light or developed in an iodine tank. Column chromatography used silica gel with particle size 33–50 µm purchased from BDH. All other materials were purchased from Sigma-Aldrich Ltd. and used as received unless indicated otherwise.

#### Typical procedure for the *in situ* preparation of the carboxylic acid chloride precursors of the aroylphosphonates **1a-h** and **2a-c**

Thionyl chloride (30 cm<sup>3</sup>) was added to the carboxylic acid (40 mmol) under an atmosphere of dry nitrogen and the mixture stirred for 12 h or until NMR spectroscopy indicated that the reaction was complete. The mixture was then warmed under reduced pressure to remove volatile components. Finally, dry toluene (5 cm<sup>3</sup>) was added and then removed under reduced pressure to give the acid chloride free from thionyl chloride.

#### Dimethyl thiophene-2-carbonylphosphonate **1a**.

Trimethyl phosphite (1.7 g, 13.7 mmol) was added dropwise over a period of 30 min to a stirred sample of thiophene-2-carbonyl chloride (2 g, 13.7 mmol) kept below 0 °C and under an atmosphere of dry nitrogen. The resulting mixture was stirred for 1 h at room temperature then purified by distillation *in vacuo*. The phosphonate **1a** was obtained as a pale yellow oil in essentially quantitative yield, bp 112 °C at 0.06 mmHg. (Found: C, 38.05; H, 4.0%; M<sup>+</sup>, 220. C<sub>7</sub>H<sub>9</sub>O<sub>4</sub>PS requires C, 38.18; H, 4.12%; M<sup>+</sup>, 220); δ<sub>P</sub>(109.3 MHz; CDCl<sub>3</sub>) 0.1; δ<sub>H</sub>(270 MHz; CDCl<sub>3</sub>) 3.91 (6 H, d, J<sub>PH</sub> 10.8, POME), 7.37 (1 H, m, 4-H), 7.67 (1 H, m, 3-H) and 8.85 (1 H, m, 5-H); δ<sub>C</sub>(67.9 MHz; CDCl<sub>3</sub>) 53.3 (x2)(d, J<sub>PC</sub> 7, POME) 128.3 (d, J<sub>PC</sub> 1, C-4), 136.9 (C-5), 137.2 (d, J<sub>PC</sub> 2, C-3), 142.1 (d, J<sub>PC</sub> 81, C-2) and 188.6 (d, J<sub>PC</sub> 182, C=O).

#### Dimethyl furan-2-carbonylphosphonate **1b**

Trimethyl phosphite (4.27 g, 34 mmol) was added slowly to a cooled (-48 °C), stirred solution of furan-2-carbonyl chloride (4.5 g, 34 mmol) in dry toluene (8 cm<sup>3</sup>) under an atmosphere of dry nitrogen. The resulting solution was allowed to warm to room temperature slowly and then stirred for 12 h. Distillation of the product *in vacuo* gave the phosphonate **1b** (4.0 g, 58%) as a pale yellow oil, bp 110 °C at 0.005 mmHg (Found: C, 41.2; H, 4.4; M<sup>+</sup>, 204. C<sub>7</sub>H<sub>9</sub>O<sub>5</sub>P requires C, 41.19; H, 4.44%; M<sup>+</sup>, 204); δ<sub>P</sub>(109.3 MHz; CDCl<sub>3</sub>) -0.1; δ<sub>H</sub>(270 MHz; CDCl<sub>3</sub>) 3.92 (6 H, d, J<sub>PH</sub> 11, POME), 6.64 (1 H, dd, J<sub>HH</sub> 4 and 2, 4-H), 7.77 (1 H, dd, J<sub>HH</sub> 2 and 1, J<sub>PH</sub> 2, 3-H) and 7.88 (1 H, dd, J<sub>HH</sub> 4 and 1, 5-H); δ<sub>C</sub>(67.9 MHz; CDCl<sub>3</sub>) 54.1 (x2)(d, J<sub>PC</sub> 7, POME), 113.0 (C-4), 125.3 (C-3), 149.5 (C-5), 151.7 (d, J<sub>PC</sub> 89, C-2) and 183.7 (d, J<sub>PC</sub> 190, C=O).

#### Dimethyl 3-benzylfuran-2-carbonylphosphonate **1c**

To a stirred solution of 3-benzylfuran-2-carbonyl chloride (1.4 g, 6.34 mmol) in dry toluene (30 cm<sup>3</sup>), cooled to -78 °C under an atmosphere of dry nitrogen was added trimethyl phosphite (0.79 g, 6.4 mmol). The mixture was then allowed to warm to room temperature and the progress of the reaction monitored by NMR spectroscopy. This showed the formation of the required phosphonate **1c**, together with a small quantity of the aldehyde **20c**, and an equivalent quantity of trimethyl phosphate. A sample of the pure phosphonate **1c** (1.2 g, 63%) was isolated as a pale yellow oil by chromatography on silica using ethyl acetate as the eluent; δ<sub>P</sub>(109.3 MHz; CDCl<sub>3</sub>) 0.9; δ<sub>H</sub>(400 MHz; CDCl<sub>3</sub>) 3.88 (6 H, d, J<sub>PH</sub> 11, POME), 4.12 (2 H, s, CH<sub>2</sub>), 6.30 (1 H, br s, 4-H), 7.11-7.17 (3 H, m, 2'/6'-H and 4'-H), 7.17-7.24 (2 H, m, 3'/5'-H) and 7.52 (1 H, d, J<sub>HH</sub> 2, 5-H); δ<sub>C</sub>(67.9 MHz; CDCl<sub>3</sub>) 31.9 (CH<sub>2</sub>), 54.4 (x2)(d, J<sub>PC</sub> 7, POME), 115.4 (d, J<sub>PC</sub> 3, C-4), 126.7 (C-4'), 128.7 (x2)(C-3'/5'), 128.9 (x2)(C-2'/6'), 138.4 (d, J<sub>PC</sub> 9, C-3), 138.6 (C-1'), 148.0 (C-5), 148.1 (d, J<sub>PC</sub> 60, C-2), and 186.2 (d, J<sub>PC</sub> 186, C=O); *m/z* (EI) 317.0489 (M<sup>+</sup>. C<sub>14</sub>H<sub>15</sub>NaO<sub>5</sub>P requires 317.0555).

#### Dimethyl 5-methylfuran-2-carbonylphosphonate **1d**

5-Methylfuran-2-carbonyl chloride (5.64 g, 39 mmol) was dissolved in dry toluene (30 cm<sup>3</sup>) and cooled to -78 °C under an atmosphere of dry nitrogen. Trimethyl phosphite (4.83 g, 39 mmol) was added and the solution allowed to warm to room temperature. After 12 h the solvent was removed under reduced pressure and the residue distilled *in vacuo*. The phosphonate **1d**

(5.1 g, 60%) was obtained as a pale yellow oil, bp 147 °C at 0.005 mmHg;  $\delta_{\text{P}}$ (109.3 MHz, CDCl<sub>3</sub>) 0.6;  $\delta_{\text{H}}$ (270 MHz; CDCl<sub>3</sub>) 2.46 (3 H, s, CH<sub>3</sub>), 3.91 (6 H, d,  $J_{\text{PH}}$  10.4, POME), 6.23 (1 H, d,  $J_{\text{HH}}$  3.5, 4-H) and 7.86 (1 H, d,  $J_{\text{HH}}$  3.5, 3-H);  $\delta_{\text{C}}$ (67.9 MHz; CDCl<sub>3</sub>) 14.1 (Me), 54.1 (x2)(d,  $J_{\text{PC}}$  7, POME), 110.3 (s, C-4), 128.2 (C-3), 151.1 (d,  $J_{\text{PC}}$  91, C-2), 161.7 (C-5) and 182.3 (d,  $J_{\text{PC}}$  189, C=O);  $m/z$  (ESI) 241.0236 (M+Na<sup>+</sup>. C<sub>8</sub>H<sub>11</sub>O<sub>5</sub>PNa requires 241.0242).

#### Dimethyl 5-phenylfuran-2-carbonylphosphonate 1e

5-Phenylfuran-2-carbonyl chloride (0.34 g, 1.63 mmol) was dissolved in dry toluene (30 cm<sup>3</sup>) and cooled to -78 °C under an atmosphere of dry nitrogen. Trimethyl phosphite (0.20 g, 1.63 mmol) was then added and the solution was allowed to warm to room temperature over a period of 12 h. Removal of the solvent under reduced pressure (60 °C at 0.005 mmHg) gave a residue which was purified by distillation *in vacuo*. The phosphonate **1e** (0.09 g, 20%) was isolated as a pale yellow oil, bp 130 °C at 0.005 mmHg;  $\delta_{\text{P}}$ (109.3 MHz, CDCl<sub>3</sub>) 0.6;  $\delta_{\text{H}}$ (400 MHz, CDCl<sub>3</sub>) 3.91 (6 H, d,  $J_{\text{PH}}$  10.8, POME), 6.88 (1 H, d,  $J_{\text{HH}}$  3.8, 4-H), 7.38-7.48 (3 H, m, 3'/5'-H and 4'-H) 7.84 (2 H, dd,  $J_{\text{HH}}$  7.5 and 1.5, 2'/6'-H) and 8.00 (1 H, d,  $J_{\text{HH}}$  3.8, 3-H);  $\delta_{\text{C}}$ (67.9 MHz; CDCl<sub>3</sub>) 54.5 (x2)(d,  $J_{\text{PC}}$  7, POME), 108.5 (C-4), 125.9 (C-2'/6'), 128.7 (C-4'), 129.1 (C-1'), 129.2 (C-3'/5'), 130.4 (C-3), 151.5(d,  $J_{\text{PC}}$  92, C-2), 161.0 (C-5) and 183.0 (d,  $J_{\text{PC}}$  189, C=O);  $m/z$  (ESI) 303.0393 (M+Na<sup>+</sup>. C<sub>13</sub>H<sub>13</sub>O<sub>5</sub>PNa requires 303.0398).

#### Dimethyl 1-methylpyrrole-2-carbonylphosphonate 1f

To a suspension of 1-methylpyrrole-2-carboxylic acid (1.0 g, 8 mmol) in benzene (30 cm<sup>3</sup>) under an atmosphere of dry nitrogen was added oxalyl chloride (2.03 g, 16 mmol) together with one drop of dimethylformamide. The mixture was then stirred at room temperature until all of the solid had dissolved (*ca.* 2 h). Volatile components were then removed under reduced pressure and the residue taken up into dry acetonitrile (30 cm<sup>3</sup>) under an atmosphere of dry nitrogen. After cooling to -40 °C trimethyl phosphite (0.99 g, 8 mmol) was added and the resulting mixture then allowed to warm to room temperature. After stirring for 48 h, volatile components were removed under reduced pressure and the residue distilled *in vacuo*. The phosphonate ester **1f** (1.04 g, 60%) was isolated as a pale yellow oil, bp 137 °C at 0.005 mmHg;  $\delta_{\text{P}}$ (109.3 MHz, CDCl<sub>3</sub>) 2.5;  $\delta_{\text{H}}$ (400 MHz, CDCl<sub>3</sub>) 3.89 (6 H, d,  $J_{\text{PH}}$  10.7, POME), 3.94 (3 H, s, N-Me), 6.24 (1 H, dd,  $J$  2.4 and 4.3, 4-H), 6.99 (1 H, m, 3-H) and 7.71 (1 H, dd,  $J$  4.3 and 1.4, 5-H);  $\delta_{\text{C}}$ (67.9 MHz; CDCl<sub>3</sub>) 37.7 (NMe), 54.0 (x2)(d,  $J_{\text{PC}}$  7, POME), 110.1 (C-4), 126.5 (d,  $J_{\text{PC}}$  2, C-3), 130.9 (d,  $J_{\text{PC}}$  86, C-2), 134.5 (C-5) and 184.2 (d,  $J_{\text{PC}}$  183, C=O);  $m/z$  (ESI) 240.0393 (M+Na<sup>+</sup>. C<sub>8</sub>H<sub>12</sub>NO<sub>4</sub>PNa requires 240.0402).

#### Dimethyl 1-phenylpyrrole-2-carbonylphosphonate 1g

Trimethyl phosphite (1.025 g, 8.26 mmol) was added dropwise to a stirred solution of 1-phenylpyrrole-2-carbonyl chloride (1.7 g, 8.26 mmol) in dry toluene (10 cm<sup>3</sup>) at room temperature under an atmosphere of dry nitrogen. The resulting solution was stirred for 48 h and then volatile components were removed *in vacuo* to give the desired phosphonate in a good state of purity. A pure sample of this material was obtained by chromatography on silica gel using hexane-ethyl acetate mixtures as the eluent;  $\delta_{\text{P}}$ (109.3 MHz, CDCl<sub>3</sub>) 2.1;  $\delta_{\text{H}}$ (400 MHz, CDCl<sub>3</sub>) 3.85 (6 H, d,  $J_{\text{PH}}$  11, POME), 6.41 (1 H, dd,  $J_{\text{HH}}$  4.3 and 2.5, 4-H), 7.09-7.10 (1 H, m, 3-H), 7.23-7.27 (2 H, m, 2'/6'-H), 7.39-7.43 (3 H, m, 3'/5'-H and 4'-H) and 7.89 (1 H, dd,  $J$  4.3 and 1.7, 5-H);  $\delta_{\text{C}}$ (100.63 MHz; CDCl<sub>3</sub>) 54.1 (x2)(d,  $J_{\text{PC}}$  7, POME), 111.3 (C-4), 126.1 (x2)(C-2'/6'), 127.4 (d,  $J_{\text{PC}}$  3, C-3), 128.3 (C-4'), 128.9 (x2)(C-3'/5'), 131.0 (d,  $J_{\text{PC}}$  88, C-2), 134.4 (C-5), 139.9 (C-1') and 183.6 (d,  $J_{\text{PC}}$  184, C=O);  $m/z$  (ESI) 302.0552 (M+Na<sup>+</sup>. C<sub>13</sub>H<sub>14</sub>NO<sub>4</sub>PNa requires 302.0558).

#### Dimethyl pyrrole-2-carbonylphosphonate 1h.

Due to problems associated with the preparation and subsequent reaction of pyrrole-2-carbonyl chloride,<sup>1</sup> it has so far proved difficult to obtain the phosphonate ester **1h** in sufficiently quantities and in a sufficiently pure state to carry out satisfactory further studies although its presence was clearly visible in the NMR spectra of the reaction product;  $\delta_{\text{P}}$ (109.3 MHz, CDCl<sub>3</sub>) 2.0;  $\delta_{\text{H}}$ (270 MHz, CDCl<sub>3</sub>) 3.90 (6 H, d,  $J_{\text{PH}}$  11, POME), 6.35 (1 H, m, 4-H), 7.24 (1 H, br s, 3-H), 7.55 (1 H, br s, 5-H), 11.20 (1 H, s, NH);  $\delta_{\text{C}}$ (67.9 MHz; CDCl<sub>3</sub>) 53.9 (x2)(d,  $J_{\text{PC}}$  7, POME), 111.9 (C-4), 122.5 (br s, C-5), 129.0 (C-3), 132.4 (d,  $J_{\text{PC}}$  80, C-2), 182.9 (d,  $J_{\text{PC}}$  184, C=O).

#### Dimethyl thiophene-3-carbonylphosphonate 2a

Trimethyl phosphite (3.4 g, 27.3 mmol) was added dropwise to a stirred sample of thiophene-3-carbonyl chloride (4 g, 27.3 mmol) at 0 °C under an atmosphere of dry nitrogen. The resulting mixture was stirred for 3 h and then distilled under reduced pressure. The phosphonate **2a** was isolated in essentially quantitative yield as a pale yellow oil, bp 126 °C at 0.08 mmHg;  $\delta_{\text{P}}$ (109.3 MHz, CDCl<sub>3</sub>) 0.75;  $\delta_{\text{H}}$ (270 MHz; CDCl<sub>3</sub>) 3.85 (6 H, d,  $J_{\text{PH}}$  11, POME), 7.31 (1 H, m, 5-H), 7.63 (1 H, dm,  $J_{\text{PH}}$  5, 4-H) and 8.81 (1 H, m, 2-H);  $\delta_{\text{C}}$  (67.9 MHz; CDCl<sub>3</sub>) 53.8 (x2)(d,  $J_{\text{PC}}$  7, POME), 126.6 (d,  $J_{\text{PC}}$  1, C-5), 126.9 (d,  $J_{\text{PC}}$  7, C-4), 138.4 (C-2), 140.5 (d,  $J_{\text{PC}}$  67, C-3) and 191.0 (d,  $J_{\text{PC}}$  178, C=O).

This compound was converted to its 2,4-dinitrophenylhydrazone derivative and recrystallised from ethanol to give a yellow solid, mp 113 °C (Found: C, 39.0; H, 3.2; N, 13.75. C<sub>13</sub>H<sub>13</sub>N<sub>4</sub>O<sub>7</sub>PS requires C, 39.01; H, 3.27; N, 14.00%).

#### Dimethyl furan-3-carbonylphosphonate 2b

Trimethyl phosphite (11.2 g, 90 mmol) was added dropwise to a stirred sample of furan-3-carbonyl chloride (11.7 g, 90 mmol) at room temperature. The resulting solution was stirred for 12 h and then distilled under reduced pressure. The phosphonate **2b** (12.4

g, 68%) was obtained as a pale yellow oil, bp 103 °C at 0.04 mmHg (Found: C, 41.15; H, 4.5. C<sub>7</sub>H<sub>9</sub>O<sub>5</sub>P requires C, 41.19; H, 4.44%); δ<sub>p</sub>(109.3 MHz, CDCl<sub>3</sub>) -0.4; δ<sub>H</sub>(270 MHz; CDCl<sub>3</sub>) 3.92 (6 H, d, *J*<sub>PH</sub> 10.8, POMe), 6.86 (1 H, m, 4-H), 7.57 (1 H, m, 5-H) and 8.74 (1 H, br s, 2-H); δ<sub>C</sub>(67.9 MHz; CDCl<sub>3</sub>) 53.9 (x2)(d, *J*<sub>PC</sub> 6, POMe), 107.2 (d, *J*<sub>PC</sub> 8, C-4), 127.2 (d, *J*<sub>PC</sub> 71, C-3), 144.4 (C-5), 153.0 (d, *J*<sub>PC</sub> 2, C-2) and 192.0 (d, *J*<sub>PC</sub> 183, C=O); *m/z* (EI) 204.0182 (M<sup>+</sup> C<sub>7</sub>H<sub>9</sub>O<sub>5</sub>P requires 204.0188).

#### Dimethyl 2-(prop-2-ynyloxymethyl)furan-3-carbonyl-phosphonate 2c

2-(Prop-2-ynyloxymethyl)furan-3-carbonyl chloride (2.18 g, 11 mmol) was dissolved in dry toluene (30 cm<sup>3</sup>) and trimethyl phosphite (1.36 g, 11 mmol) was added. The mixture was then stirred under an atmosphere of dry nitrogen for 12 h at room temperature. Volatile components were then removed under reduced pressure and the residue distilled *in vacuo*. The phosphonate ester **2c** was obtained as a pale yellow oil in essentially quantitative yield, bp 130 °C at 0.005 mmHg; δ<sub>p</sub>(109.3 MHz, CDCl<sub>3</sub>) 0.2; δ<sub>H</sub>(400 MHz, CDCl<sub>3</sub>) 2.49 (1 H, t, *J*<sub>HH</sub> 2.4, CCH), 3.90 (6 H, d, *J*<sub>PH</sub> 10.8, POMe), 4.22 (2 H, d, *J*<sub>PH</sub> 2.3, CH<sub>2</sub>), 4.89 (2 H, s, CH<sub>2</sub>), 6.71 (1 H, d, *J*<sub>HH</sub> 1.8, 4-H) and 7.40 (1 H, d, *J*<sub>HH</sub> 1.8, 5-H); δ<sub>C</sub>(67.9 MHz; CDCl<sub>3</sub>) 54.4 (x2)(d, *J*<sub>PC</sub> 7, POMe), 58.5 (CH<sub>2</sub>), 63.1 (CH<sub>2</sub>Ar), 75.5 (CH), 79.4 (C), 111.4 (d, *J*<sub>PC</sub> 2, C-4), 122.7 (d, *J*<sub>PC</sub> 69, C-3), 142.9 (C-5), 158.4 (d, *J*<sub>PC</sub> 15.6, C-2) and 193.9 (d, *J*<sub>PC</sub> 185, C=O); *m/z* (ESI) 290.0792, (M+NH<sub>4</sub><sup>+</sup>)<sup>2</sup> C<sub>11</sub>H<sub>17</sub>NO<sub>6</sub>P requires 290.0788.

#### Reaction of dimethyl furan-2-carbonylphosphonate 1b with triethyl phosphite

Triethyl phosphite (3.2 g, 20 mmol) was slowly added to a stirred sample of dimethyl furan-2-carbonylphosphonate **1b** (2.0 g, 10 mmol) at -40 °C under an atmosphere of dry nitrogen. The resulting solution was then allowed to warm slowly to room temperature. After a period of *ca.* 12 h, volatile components were removed by warming under reduced pressure (50 °C at 0.005 mmHg)<sup>3</sup> to give dimethyl 5-[(*Z*)-4-(dimethoxy-phosphoryl)-but-1-en-3-ynyl]-4-furan-2-yl-2,2,2-triethoxy-2λ<sup>5</sup>-[1,3,2]dioxaphospholan-4-yl-phosphonate **19b'** in a good state of purity; δ<sub>p</sub>(109.3 MHz, CDCl<sub>3</sub>) 19.0 [d, *J*<sub>PP</sub> 41, P(O)(OMe)<sub>2</sub>], -3.4 [s, CCP(O)(OMe)<sub>2</sub>] and -51.4 [d, *J*<sub>PP</sub> 41, P(OEt)<sub>3</sub>]; δ<sub>C</sub>(67.9 MHz, CDCl<sub>3</sub>) 16.4 (x3)(d, *J*<sub>PC</sub> 9, Me), 53.5 (x2)(d, *J*<sub>PC</sub> 5, POMe), 54.1 (d, *J*<sub>PC</sub> 7, POMe), 54.4 (d, *J*<sub>PC</sub> 7, POMe), 63.5 (x3)(d, *J*<sub>PC</sub> 9, POCH<sub>2</sub>), 70.2 (dd, *J*<sub>PC</sub> 6 and 2, C-5), 75.8 (dd, *J*<sub>PC</sub> 179 and 2, C-4), 82.4 (d, *J*<sub>PC</sub> 298, C-4'), 95.2 (d, *J*<sub>PC</sub> 53, C-3'), 110.2 (d, *J*<sub>PC</sub> 4, C-3 furan), 110.6 (C-4 furan), 111.3 (d, *J*<sub>PC</sub> 7, C-2'), 143.1 (s, C-5 furan), 144.2 (d, *J*<sub>PC</sub> 14, C-1'), 148.6 (d, *J*<sub>PC</sub> 7, C-2 furan). Efforts to purify the triphosphorus compound **19b'** by chromatography were unsuccessful leading to the formation of decomposition products.

#### Supplementary NMR Data

*Tetramethyl thiophen-2-ylmethane-1,1-bisphosphonate 6a*; δ<sub>p</sub>(109.3 MHz, CDCl<sub>3</sub>) 19.7; δ<sub>H</sub>(400 MHz, CDCl<sub>3</sub>) 3.72 (6 H, d, *J*<sub>PC</sub> 11.0, POMe), 3.82 (6 H, d, *J*<sub>PC</sub> 11.0, POMe), 4.12 (1 H, t, *J*<sub>PC</sub> 25.0, α-CH), 7.03 (1 H, dd, *J*<sub>HH</sub> 3.6 and 5.1, 4-H) and 7.26–7.30 (2 H, m, 3-H and 5-H); δ<sub>C</sub>(100.63 MHz, CDCl<sub>3</sub>) 39.5 (t, *J*<sub>PC</sub> 136, α-C), 53.7 (t, *J*<sub>PC</sub> 6, POMe), 54.3 (t, *J*<sub>PC</sub> 6, POMe), 126.0 (t, *J*<sub>PC</sub> 3, C-4), 127.2 (t, *J*<sub>PC</sub> 3, C-5), 129.2 (t, *J*<sub>PC</sub> 7, C-3) and 129.6 (t, *J*<sub>PC</sub> 10, C-2).

*Tetramethyl 3-benzylfuran-2-ylmethane-1,1-bisphosphonate 6c*; δ<sub>p</sub>(109.3 MHz, CDCl<sub>3</sub>) 19.5; δ<sub>H</sub>(400 MHz, CDCl<sub>3</sub>) 3.73 (6 H, d, *J*<sub>PH</sub> 11.3, POMe), 3.77 (2 H, br s, CH<sub>2</sub>), 3.76 (6 H, d, *J*<sub>PH</sub> 11.3, POMe), 4.03 (1 H, t, *J*<sub>PH</sub> 25.7, α-H), 6.20 (1 H, br 's', 4-H), 7.17–7.22 (3 H, m, 2'/6'-H and 4'-H), 7.28 (2 H, tm, *J* 7.6, 3'/5'-H) and 7.40 (1 H, q, *J* 2, 5-H); δ<sub>C</sub>(100.63 MHz, CDCl<sub>3</sub>) 31.1 (CH<sub>2</sub>), 37.5 (t, *J*<sub>PC</sub> 136, α-CH), 53.8 (x2)(t, 'J'<sub>PC</sub> 3, POMe), 54.1 (x2)(t, 'J'<sub>PC</sub> 3, POMe), 113.0 (t, *J*<sub>PC</sub> 3, C-4), 123.0 (t, *J*<sub>PC</sub> 8.5, C-3), 126.5 (C-4'), 128.4 (x2)(C-3'/5'), 128.6 (x2)(C-2'/6'), 139.0 (t, *J*<sub>PC</sub> 12, C-2), 139.7 (t, *J*<sub>PC</sub> 2, C-1') and 142.6 (t, *J*<sub>PC</sub> 3, C-5).

*Tetramethyl 5-methylfuran-2-ylmethane-1,1-bisphosphonate 6d*; δ<sub>p</sub>(109.3 MHz, CDCl<sub>3</sub>) 19.0; δ<sub>H</sub>(400 MHz, CDCl<sub>3</sub>) 2.29 (3 H, s, Me), 3.74 (6 H, d, *J*<sub>PH</sub> 10.9, POMe), 3.81 (6 H, d, *J*<sub>PH</sub> 10.9, POMe), 4.04 (1 H, t, *J*<sub>PH</sub> 25.2, α-CH), 5.98 (1 H, d, *J*<sub>PH</sub> 3, 4-H) and 6.40 (1 H, dt, *J*<sub>HH</sub> 3, *J*<sub>PH</sub> 3, 3-H); δ<sub>C</sub>(100.63 MHz, CDCl<sub>3</sub>) 12.8 (Me), 37.7 (t, *J*<sub>PC</sub> 136, α-CH), 53.1 (x2)(m, POMe), 53.1 (x2)(m, POMe), 106.6 (t, *J*<sub>PC</sub> 2, C-4), 110.8, (t, *J*<sub>PC</sub> 6, C-3), 139.8 (t, *J*<sub>PC</sub> 8, C-2) and 151.8 (t, *J*<sub>PC</sub> 3, C-5).

*Tetramethyl 5-phenylfuran-2-ylmethane-1,1-bisphosphonate 6e*; δ<sub>p</sub>(109.3 MHz, CDCl<sub>3</sub>) 18.8; δ<sub>H</sub>(400 MHz, CDCl<sub>3</sub>) 3.77 (6 H, d, *J*<sub>PC</sub> 11, POMe), 3.83 (6 H, d, *J*<sub>PC</sub> 11, POMe), 4.16 (1 H, t, *J*<sub>PC</sub> 25.5, α-CH), 6.61 (1 H, dt, *J*<sub>HH</sub> 3.4, *J*<sub>PH</sub> 3, 3-H), 6.65 (1 H, d, *J*<sub>HH</sub> 3.4, 4-H), 7.26 (1 H, m, 4'-H), 7.40 (2 H, t, *J*<sub>HH</sub> 7.5, 3'/5'-H), 7.65 (2 H, d, *J*<sub>HH</sub> 7.5, 2'/6'-H); δ<sub>C</sub>(100.63 MHz, CDCl<sub>3</sub>) 38.9 (t, *J*<sub>PC</sub> 136, α-CH), 54.0 (m, POMe), 54.5 (m, POMe), 106.6 (t, *J*<sub>PC</sub> 3, C-4), 112.8 (t, *J*<sub>PC</sub> 6, C-3), 123.8 (C-2'/6'), 127.7 (C-4'), 128.9 (C-3'/5'), 130.5 (C-1'), 142.2 (t, *J*<sub>PC</sub> 8, C-2), 154.3 (t, *J*<sub>PC</sub> 3, C-5).

*Tetramethyl 1-methylpyrrole-2-ylmethane-1,1-bisphosphonate 6f*; δ<sub>p</sub>(109.3 MHz, CDCl<sub>3</sub>) 20.0; δ<sub>H</sub>(270 MHz, CDCl<sub>3</sub>) 3.59 (3 H, br s, NCH<sub>3</sub>), 3.67 (6 H, d, *J*<sub>PH</sub> 11, POMe), 3.77 (6 H, d, *J*<sub>PH</sub> 11, POMe), 3.72 (1 H, br t, *J*<sub>PH</sub> 25, α-CH), 6.09 (1 H, dd, *J* 3.8 and 2.8, 4-H), 6.48 (1 H, br s, 5-H) and 6.62 (1 H, m, 3-H); δ<sub>C</sub>(100.63 MHz, CDCl<sub>3</sub>) 33.9 (NCH<sub>3</sub>), 36.1 (t, *J*<sub>PC</sub> 133, α-C), 53.8 (x2)(t, 'J'<sub>PC</sub> 3.5, POMe), 54.4 (x2)(t, 'J'<sub>PC</sub> 3.5, POMe), 107.5 (t, *J*<sub>PC</sub> 2, C-4), 111.4 (t, *J*<sub>PC</sub> 4, C-3), 118.2 (t, *J*<sub>PC</sub> 6, C-2) and 124.3 (t, *J*<sub>PC</sub> 3, C-5).

*Tetramethyl 1-phenylpyrrole-2-ylmethane-1,1-bisphosphonate 6g*; δ<sub>p</sub>(109.3 MHz, CDCl<sub>3</sub>) 20.1; δ<sub>H</sub>(400 MHz, CDCl<sub>3</sub>) 3.68 (6 H, d, *J*<sub>PC</sub> 11.0, POMe), 3.71 (6 H, d, *J*<sub>PC</sub> 11.0, POMe), 3.87 (1 H, t, *J*<sub>PC</sub> 25.7, α-CH), 6.28 (1 H, t, 3.2, X-H), 6.65 (1 H, m, 3-H), 6.83 (1 H, m, 4-H), 7.31–7.35 (2 H, m, 2'/6'-H), 7.38–7.43 (1 H, m, 4'-H), 7.44–7.50 (2 H, m, 3'/5'-H); δ<sub>C</sub>(100.63 MHz, CDCl<sub>3</sub>) 35.9 (t,

$J_{PC}$  139,  $\alpha$ -C), 53.7 (m, POMe), 54.4 (m, POMe), 108.91 (t,  $J_{PC}$  2, C-4), 112.3 (t,  $J_{PC}$  4, C-3), 119.2 (t,  $J_{PC}$  6, C-2), 123.6 (t,  $J_{PC}$  2, C-5), 126.9 (x2)(C-2'/6'), 128.2 (C-4'), 129.6 (x2)(C-3'/5') and 139.0 (C-1').

*Dimethyl thiophen-2-ylmethylphosphonate 7a*;  $\delta_P$ (109.3 MHz, CDCl<sub>3</sub>) 27.3;  $\delta_H$ (400 MHz, CDCl<sub>3</sub>) 3.37 (2 H, d,  $J_{PH}$  20.8, CH<sub>2</sub>), 3.70 (6 H, d,  $J_{PH}$  10.8, POMe), 6.94–7.12 (2 H, m, 4-H and 5-H) and 7.18 (1 H, ddd,  $J_{HH}$  1.8 and 1.2,  $J_{PH}$  5.0, 3-H);  $\delta_C$ (100.63 MHz, CDCl<sub>3</sub>) 27.1 (d,  $J_{PC}$  144, CH<sub>2</sub>), 53.1 (x2)(d,  $J_{PC}$  7, POMe), 124.9 (d,  $J_{PC}$  4, C-4), 127.2 (d,  $J_{PC}$  4, C-5), 127.5 (d,  $J_{PC}$  9, C-3) and 132.1 (d,  $J_{PC}$  10, C-2).

*Dimethyl 5-methylfuran-2-ylmethylphosphonate 7d*;  $\delta_P$ (109.3 MHz, CDCl<sub>3</sub>) 26.7;  $\delta_H$ (400 MHz, CDCl<sub>3</sub>) 2.26 (3 H, d,  $J_{PH}$  2, Me), 3.21 (2 H, d,  $J_{PH}$  20.8, CH<sub>2</sub>), 3.69 (6 H, d, 10.9, POMe), 5.91 (1 H, d,  $J_{HH}$  2.5, 3-H) and 6.11 (1 H, d,  $J_{HH}$  3.5, 4-H);  $\delta_C$ (100.63 MHz, CDCl<sub>3</sub>) 13.4 (Me), 25.7 (d,  $J_{PC}$  144, CH<sub>2</sub>), 52.8 (x2)(d,  $J_{PC}$  7, POMe), 106.7 (d,  $J_{PC}$  2, C-4), 109.0 (d,  $J_{PC}$  7, C-3), 143.0 (d,  $J_{PC}$  10, C-2) and 151.6 (d,  $J_{PC}$  3, C-5).

*Dimethyl 5-phenylfuran-2-ylmethylphosphonate 7e*;  $\delta_P$ (109.3 MHz, CDCl<sub>3</sub>) 26.1;  $\delta_H$ (400 MHz, CDCl<sub>3</sub>) 3.33 (2 H, d,  $J_{PH}$  21, CH<sub>2</sub>), 3.76 (6 H, d,  $J_{PH}$  10.9, POMe), 6.34 (1 H, t,  $J_{HH}$  3.5,  $J_{PH}$  3.5, 3-H) 6.60 (1 H, d,  $J_{HH}$  3.5, 4-H), 7.24 (1 H, t,  $J_{HH}$  7.4, 4'-H), 7.37 (2 H, t,  $J_{HH}$  7.5, 3'/5'-H) and 7.64 (2 H, d,  $J_{HH}$  7.5, 2'/6'-H);  $\delta_C$ (100.63 MHz, CDCl<sub>3</sub>) 26.1 (d,  $J_{PC}$  144, CH<sub>2</sub>), 53.2 (d,  $J_{PC}$  7, POMe), 106.4 (d,  $J_{PC}$  3.5, C-3), 110.7 (d,  $J_{PC}$  8, C-4), 123.7 (C-2'/6'), 127.4 (C-4'), 128.8 (C-3'/5'), 129.1 (d,  $J_{PC}$  3, C-1'), 145.0 (d,  $J_{PC}$  10, C-2) and 153.7 (d,  $J_{PC}$  3, C-5).

*Dimethyl 1-methylpyrrol-2-ylmethylphosphonate 7f*;  $\delta_P$ (109.3 MHz, CDCl<sub>3</sub>) 27.4;  $\delta_H$ (400 MHz, CDCl<sub>3</sub>) 3.12 (2 H, d,  $J_{PH}$  20, CH<sub>2</sub>), 3.63 (3 H, s, NCH<sub>3</sub>), 3.66 (6 H, d,  $J_{PH}$  10.7, POMe), 6.0–6.05 (2 H, m, 3-H and 4-H) and 6.58 (1 H, dt,  $J_{PH}$  2.2,  $J_{HH}$  2.3, 5-H);  $\delta_C$ (100.63 MHz, CDCl<sub>3</sub>) 24.1 (d,  $J_{PC}$  144, CH<sub>2</sub>), 34.1 (s, NCH<sub>3</sub>), 53.1 (x2)(d,  $J_{PC}$  7, POMe), 107.3 (d,  $J_{PC}$  3, C-4), 109.3 (d,  $J_{PC}$  7, C-3), 121.5 (d,  $J_{PC}$  9, C-2) and 122.8 (d,  $J_{PC}$  3, C-5).

*Dimethyl 5-(dimethoxyphosphorylmethyl)thiophen-2-yl-phosphonate 10*;  $\delta_P$ (109.3 MHz, CDCl<sub>3</sub>) 15.2 [d,  $J_{PP}$  3, P(O)(OMe)<sub>2</sub>] and 26.3 [d,  $J_{PP}$  3, CH<sub>2</sub>P(O)(OMe)<sub>2</sub>];  $\delta_H$ (400 MHz, CDCl<sub>3</sub>) 3.34 (2 H, d,  $J_{PC}$  21.2, CH<sub>2</sub>), 3.67 (6 H, d,  $J_{PC}$  10.8, POMe), 3.69 (6 H, d,  $J_{PC}$  11.4, POMe), 7.10 (1 H, dd,  $J_{HH}$  3.6,  $J_{PC}$  3.5, 4-H) and 7.44 (1 H, ddd,  $J_{HH}$  3.6,  $J_{PC}$  8.5 and 0.5, 3-H);  $\delta_C$ (100.63 MHz, CDCl<sub>3</sub>) 26.3 (d,  $J_{PC}$  143, CH<sub>2</sub>), 52.0 (x2)(d,  $J_{PC}$  6, POMe), 52.1 (x2)(d,  $J_{PC}$  7, POMe), 124.7 (dd,  $J_{PC}$  211 and 4, C-2), 127.6 (dd,  $J_{PC}$  17 and 8, C-3), 136.2 (dd,  $J_{PC}$  11 and 4, C-4) and 140.7 (dd,  $J_{PC}$  10 and 8, C-5).

*Tetramethyl 1-(thiophen-3-yl)ethane-1,1-bisphosphonate 15a*;  $\delta_P$ (109.3 MHz, CDCl<sub>3</sub>) 24.7;  $\delta_H$ (270 MHz, CDCl<sub>3</sub>) 1.86 (3 H, t,  $J_{PH}$  16, Me), 3.56 (6 H, d,  $J_{PH}$  11, POMe), 3.68 (6 H, d,  $J_{PH}$  11, POMe), 7.25 (1 H, dd,  $J$  5 and 3, 5-H) and 7.35–7.43 (2 H, m, 2-H and 4-H);  $\delta_C$ (67.9 MHz, CDCl<sub>3</sub>) 18.0 (t,  $J_{PC}$  6, Me), 44.3 (t,  $J_{PC}$  140,  $\alpha$ -C), 53.9 (x2)(m, POMe), 54.4 (x2)(m, POMe), 124.2 (t,  $J_{PC}$  8, C-2), 125.1 (t,  $J_{PC}$  1, C-5), 129.0 (t,  $J_{PC}$  4, C-4) and 134.0 (t,  $J_{PC}$  8, C-3).

*Tetramethyl 1-(furan-3-yl)ethane-1,1-bisphosphonate 15b*;  $\delta_P$ (109.3 MHz, CDCl<sub>3</sub>) 24.6;  $\delta_H$ (270 MHz, CDCl<sub>3</sub>) 1.73 (3 H, t,  $J_{PH}$  16, Me), 3.64 (6 H, d,  $J_{PH}$  10.3, POMe), 3.71 (6 H, d,  $J_{PH}$  10.3, POMe), 6.62 (1 H, m, 4-H), 7.35 (1 H, m, 5-H) and 7.45 (1 H, m, 2-H);  $\delta_C$ (69.7 MHz, CDCl<sub>3</sub>) 16.2 (t,  $J_{PC}$  6, Me), 39.4 (t,  $J_{PC}$  136,  $\alpha$ -C), 52.9 (x2)(m, POMe), 53.3 (x2)(m, POMe), 110.5 (t,  $J_{PC}$  4, C-4), 118.4 (t,  $J_{PC}$  8, C-3), 140.5 (t,  $J_{PC}$  9, C-2) and 141.7 (C-5).

*Tetramethyl thiophen-3-ylmethane-1,1-bisphosphonate 16a*;  $\delta_P$ (109.3 MHz, CDCl<sub>3</sub>) 20.8;  $\delta_H$ (400 MHz, CDCl<sub>3</sub>) 3.67 (6 H, d,  $J_{PH}$  11.0, POMe), 3.78 (6 H, d,  $J_{PH}$  11.0, POMe), 4.02 (1 H, t,  $J_{PH}$  24.7,  $\alpha$ -CH), 7.18 (1 H, dm,  $J_{HH}$  5, 4-H), 7.33 (1 H, dd,  $J$  5 and 3, 5-H) and 7.40–7.43 (1 H, m, 2-H);  $\delta_C$ (100.63 MHz, CDCl<sub>3</sub>) 40.1 (t,  $J_{PC}$  134,  $\alpha$ -CH), 53.5 (m, POMe), 54.0 (m, POMe), 125.4 (t,  $J_{PC}$  8, C-2), 126.1 (t,  $J_{PC}$  1, C-5), 128.1 (t,  $J_{PC}$  8, C-3) and 129.4 (t,  $J_{PC}$  4, C-4).

*Tetramethyl furan-3-ylmethane-1,1-bisphosphonate 16b*;  $\delta_P$ (109.3 MHz, CDCl<sub>3</sub>) 21.2;  $\delta_H$ (400 MHz, CDCl<sub>3</sub>) 3.73 (6 H, d,  $J_{PH}$  11.0, POMe), 3.77 (1 H, t,  $J_{PH}$  ~24,  $\alpha$ -H), 3.79 (6 H, d,  $J_{PH}$  11.0, POMe), 6.54 (1 H, br s, 4-H), 7.42 (1 H, br s, 5-H) and 7.55 (1 H, br t,  $J_{PH}$  3, 2-H);  $\delta_C$ (100.63 MHz, CDCl<sub>3</sub>) 34.9 (t,  $J_{PC}$  136,  $\alpha$ -CH), 53.5 (x2)(m, POMe), 54.0 (x2)(m, POMe), 111.8 (t,  $J_{PC}$  4, C-4), 112.9 (t,  $J_{PC}$  9, C-3), 141.9 (t,  $J_{PC}$  9, C-2) and 143.0 (C-5).

*Tetramethyl 2-(prop-2-ynyloxymethyl)furan-3-ylmethane-1,1-bisphosphonate 16c* was isolated as a pale yellow oil;  $\delta_P$ (109.3 MHz, CDCl<sub>3</sub>) 21.2;  $\delta_H$ (400 MHz, CDCl<sub>3</sub>) 2.53 (1 H, t,  $J_{HH}$  2.4, CCH), 3.78 (6 H, d,  $J_{PH}$  11.0, POMe), 3.82 (6 H, d,  $J_{PH}$  11.0, POMe), 3.97 (1 H, t,  $J_{PH}$  24.6,  $\alpha$ -H), 4.18 (2 H, d,  $J_{HH}$  2.4, CH<sub>2</sub>), 4.61 (2 H, t,  $J_{HH}$  1.3, CH<sub>2</sub>), 6.72 (1 H, d,  $J_{HH}$  1.8, 4-H) and 7.42 (1 H, d,  $J_{HH}$  1.8, 5-H);  $\delta_C$ (100.63 MHz, CDCl<sub>3</sub>) 34.9 (t,  $J_{PC}$  136,  $\alpha$ -CH), 53.7 (x2)(m, POMe), 53.8 (x2)(m, POMe), 57.1 (CH<sub>2</sub>), 61.2 (CH<sub>2</sub>), 75.4 (CH), 79.4 (C), 112.6 (C-4), 113.2 (t,  $J_{PC}$  9, C-3), 142.7 (C-5) and 148.9 (t,  $J_{PC}$  11, C-2).

*Dimethyl thiophene-3-ylmethylphosphonate 17a*;  $\delta_P$ (109.3 MHz, CDCl<sub>3</sub>) 28.8;  $\delta_H$ (400 MHz, CDCl<sub>3</sub>) 3.22 (2 H, d,  $J_{PH}$  20.9, CH<sub>2</sub>), 3.68 (6 H, d,  $J_{PH}$  10.7, POMe), 7.10 (1 H, dt,  $J$  5 and 1.2, 4-H), 7.16–7.14 (1 H, m, 2-H) and 7.24 (1 H, dt,  $J$  5 and 3.2, 5-H);

$\delta_C$ (100.63 MHz, CDCl<sub>3</sub>) 27.3 (d,  $J_{PC}$  141, CH<sub>2</sub>), 52.8 (x2)(d,  $J_{PC}$  7, POMe), 123.2 (d,  $J_{PC}$  10, C-2), 125.8 (d,  $J_{PC}$  2, C-5), 128.8 (d,  $J_{PC}$  7, C-4) and 130.4 (d,  $J_{PC}$  9, C-3).

*Dimethyl 1-(dimethoxyphosphoryloxy)-1-(thiophen-3-yl)methyl-phosphonate 18a*;  $\delta_P$ (109.3 MHz, CDCl<sub>3</sub>) 2.0 (d,  $J_{PP}$  32), 19.2 (d,  $J_{PP}$  32);  $\delta_H$ (400 MHz, CDCl<sub>3</sub>) 3.55 (3 H, d,  $J_{PH}$  11.2, POMe), 3.72 (3 H, d,  $J_{PH}$  10.6, POMe), 3.77 (3 H, d,  $J_{PH}$  11.2, POMe), 3.80 (3 H, d,  $J_{PH}$  10.6, POMe), 5.72 (1 H, dd,  $J_{PH}$  10 and 13,  $\alpha$ -CH), 7.30 (1 H, dm,  $J$  5, 4-H), 7.36 (1 H, dd,  $J$  5 and 3, 5-H) and 7.52-7.55 (1 H, m, 2-H);  $\delta_C$ (100.63 MHz, CDCl<sub>3</sub>) 53.9 (d,  $J_{PC}$  6, POMe), 54.0 (d,  $J_{PC}$  6, POMe), 54.2 (d,  $J_{PC}$  6, POMe), 54.5 (d,  $J_{PC}$  6, POMe), 70.4 (dd,  $J_{PC}$  176 and 7,  $\alpha$ -C), 125.6 (d,  $J_{PC}$  10, C-3), 126.6 (C-5), 127.0 (d,  $J_{PC}$  3, C-4) and 133.7 (C-2).

*Dimethyl 1-(dimethoxyphosphoryloxy)-1-(furan-3-yl)methyl-phosphonate 18b*;  $\delta_P$ (109.3 MHz, CDCl<sub>3</sub>) 1.7, (d,  $J_{PP}$  33) and 19.3 (d,  $J_{PP}$  33);  $\delta_H$ (400 MHz, CDCl<sub>3</sub>) 3.60 (3 H, d, 11.4, POMe), 3.77 (3 H, d,  $J_{PH}$  10.6, POMe), 3.79 (3 H, d,  $J_{PH}$  11.4, POMe), 3.83 (3 H, d,  $J_{PH}$  10.6, POMe), 5.62 (1 H, dd,  $J_{PH}$  13 and 10,  $\alpha$ -CH), 6.64 (1 H, m, 4-H), 7.46 (1 H, t,  $J_{HH}$  1.7, 5-H) and 7.67 (1 H, m, 2-H);  $\delta_C$ (100.63 MHz, CDCl<sub>3</sub>) 53.8 (d,  $J_{PC}$  7, POMe), 53.9 (d,  $J_{PC}$  7, POMe), 54.1 (d,  $J_{PC}$  6, POMe), 54.3 (d,  $J_{PC}$  6, POMe), 67.0 (dd,  $J_{PC}$  180 and 6,  $\alpha$ -C), 109.8 (d,  $J_{PC}$  4, C-4), 118.3 (C-3), 142.3 (d,  $J_{PC}$  11, C-2) and 142.6 (C-5).

*Dimethyl 5-[(Z)-4-(dimethoxy-phosphoryl)-but-1-en-3-ynyl]-4-furan-2-yl-2,2,2-trimethoxy-2 $\lambda^5$ -[1,3,2]dioxaphospholan-4-yl-phosphonate 19b*;  $\delta_P$ (109.3 MHz, CDCl<sub>3</sub>) 19.0 [d,  $J_{PP}$  41, P(O)(OMe)<sub>2</sub>], -3.4 [s, CCP(O)(OMe)<sub>2</sub>] and -48.3 [d,  $J_{PP}$  41, P(OMe)<sub>3</sub>];  $\delta_H$ (270 MHz, CDCl<sub>3</sub>) 3.66 (6 H, d,  $J_{HH}$  12.9, POMe), 3.77 (9 H, br d,  $J_{HH}$  11, POMe), 3.84 (6 H, d,  $J_{HH}$  11.7, POMe), 5.20 (1 H, dd,  $J_{HH}$  9,  $J_{PH}$  9.3, 5-H), 5.73 (1 H, dd,  $J_{HH}$  11 and 9, 1'-H), 5.80 (1 H, dd,  $J_{HH}$  11,  $J_{PH}$  3.5, 2'-H), 6.41 (1 H, m, furan 4-H), 6.55 (1 H, m, furan 3-H), 7.47 (1 H, m, furan 5-H);  $\delta_C$ (100.65 MHz, CDCl<sub>3</sub>) 53.14 (m, POMe), 53.16 (m, POMe), 53.8 (d,  $J_{PC}$  7, POMe), 54.1 (d,  $J_{PC}$  7, POMe), 55.1 (x3)(d,  $J_{PC}$  8, POMe), 70.1 (dd,  $J_{PC}$  5 and 2, C-5), 75.6 (dd,  $J_{PC}$  176 and 2, C-4), 82.4 (d,  $J_{PC}$  298, C-4'), 94.9 (d,  $J_{PC}$  52, C-3'), 110.0 (d,  $J_{PC}$  4, C-3 furan), 110.3 (C-4 furan), 111.1 (d,  $J_{PC}$  5, C-2'), 142.9 (d,  $J_{PC}$  1, C-5 furan), 143.4 (d,  $J_{PC}$  13, C-1'), 148.0 (d,  $J_{PC}$  6, C-2 furan).

*Dimethyl 5-[(Z)-4-(dimethoxy-phosphoryl)-but-1-en-3-ynyl]-4-furan-2-yl-2,2,2-triethoxy-2 $\lambda^5$ -[1,3,2]dioxaphospholan-4-yl-phosphonate 19b'*;  $\delta_P$ (109.3 MHz, CDCl<sub>3</sub>) 19.0 [d,  $J_{PP}$  41, P(O)(OMe)<sub>2</sub>], -3.4 [s, CCP(O)(OMe)<sub>2</sub>] and -51.4 [d,  $J_{PP}$  41, P(OEt)<sub>3</sub>];  $\delta_C$ (67.9 MHz, CDCl<sub>3</sub>) 16.4 (x3)(d,  $J_{PC}$  9, Me), 53.5 (x2)(d,  $J_{PC}$  5, POMe), 54.1 (d,  $J_{PC}$  7, POMe), 54.4 (d,  $J_{PC}$  7, POMe), 63.5 (x3)(d,  $J_{PC}$  9, POCH<sub>2</sub>), 70.2 (dd,  $J_{PC}$  6 and 2, C-5), 75.8 (dd,  $J_{PC}$  179 and 2, C-4), 82.4 (d,  $J_{PC}$  298, C-4'), 95.2 (d,  $J_{PC}$  53, C-3'), 110.2 (d,  $J_{PC}$  4, C-3 furan), 110.6 (C-4 furan), 111.3 (d,  $J_{PC}$  7, C-2'), 143.1 (s, C-5 furan), 144.2 (d,  $J_{PC}$  14, C-1'), 148.6 (d,  $J_{PC}$  7, C-2 furan).

*The 2,4-dinitrophenylhydrazone derivative of dimethyl (Z)-5-oxo-pent-3-en-1-ynylphosphonate 20b*

*Dimethyl (Z)-5-[(2,4-dinitrophenyl)hydrazono]pent-3-en-1-ynylphosphonate*;  $\delta_P$ (109.3 MHz, CDCl<sub>3</sub>) -3.1;  $\delta_H$ (400 MHz, CDCl<sub>3</sub>) 2.11 (1 H, s, NH), 3.86 (6 H, d,  $J_{PH}$  12.2, POMe), 6.04 (1 H, dd,  $J_{HH}$  11.1 and 1,  $J_{PH}$  4, 3-H), 6.93 (1 H, ddd,  $J_{HH}$  11.1 and 9.7,  $J_{PH}$  1.4, 4-H), 8.00 (1 H, d,  $J_{HH}$  9.6, 6'-H), 8.31 (1 H, d,  $J_{HH}$  9.7, 5-H), 8.36 (1 H, dd,  $J_{HH}$  9.6, 2.6 and 0.5, 5'-H) and 9.13 (1 H, d,  $J_{HH}$  2.6, 3'-H);  $\delta_C$ (100.63 MHz, CDCl<sub>3</sub>) 53.8 (x2)(d,  $J_{PC}$  6, POMe), 86.2 (d,  $J_{PC}$  299, C-1), 94.9 (d,  $J_{PC}$  52, C-2), 112.6 (d,  $J_{PC}$  6, C-3), 117.3 (C-6'), 123.4 (C-3'), 130.2 (C-5'), 130.6 (C-2'), 139.4 (C-4'), 141.2 (d,  $J_{PC}$  3, C-4), 144.3 (C-1') and 144.9 (C-5).

*Dimethyl (Z)-3-benzyl-5-oxo-pent-3-en-1-ynylphosphonate 20c*;  $\delta_P$ (109.3 MHz, CDCl<sub>3</sub>) -4.5;  $\delta_H$ (400 MHz, CDCl<sub>3</sub>) 3.72 (2 H, br d,  $J_{PH}$  1, CH<sub>2</sub>), 3.73 (6 H, d,  $J_{PH}$  12, POMe), 6.34 (1 H, dq,  $J$  8 and 1.2, CH=), 7.21 (2 H, dm,  $J_{HH}$  8, 2'/6'-H), 7.27-7.32 (1 H, m, 4'-H), 7.35 (1 H, tm,  $J_{HH}$  8, 3'/5'-H) and 10.05 (1 H, d,  $J_{HH}$  8, CHO);  $\delta_C$ (100.63 MHz, CDCl<sub>3</sub>) 43.5 (d,  $J_{PC}$  2, CH<sub>2</sub>), 53.8 (d,  $J_{PC}$  6, POMe), 54.5 (d,  $J_{PC}$  6, POMe), 88.2 (d,  $J_{PC}$  291, C-1), 94.1 (d,  $J_{PC}$  50, C-2), 127.8 (C-4'), 129.1 (x2)(C-3'/5'), 129.4 (x2)(C-2'/6'), 135.2 (C-1'), 138.9 (d,  $J_{PC}$  2, C-4), 141.3 (d,  $J_{PC}$  6, C-3) and 191.1 (s, C-5).

*Dimethyl (Z)-3-benzyl-5-(dimethoxyphosphoryloxy)penta-1,2,4-trienylphosphonate 23*;  $\delta_P$ (109.3 MHz, CDCl<sub>3</sub>) -1.9 and 17.3;  $\delta_H$ (400 MHz, CDCl<sub>3</sub>) 3.47 (2 H, br dt,  $J_{PH}$  6.1,  $J_{HH}$  2.7, CH<sub>2</sub>), 3.57 (3 H, d,  $J_{PH}$  11.3, POMe), 3.58 (3 H, d,  $J_{PH}$  11.3, POMe), 3.67 (3 H, d,  $J_{PH}$  11.4, POMe), 3.68 (3 H, d,  $J_{PH}$  11.4, POMe), 4.82 (1 H, ddt,  $J_{HH}$  6.4 and 1.6,  $J_{PH}$  2.7, 4-H), 5.35 (1 H, tddd,  $J_{HH}$  2.7, 1.6 and 1.6,  $J_{PH}$  1.4, 1-H), 6.46 (1 H, dddd,  $J_{HH}$  6.4 and 1.6,  $J_{PH}$  6.6 and 3.2, 5-H), 7.21 (1 H, m, 4'-H) and 7.15-7.22 (4 H, m, 2'/6'-H and 3'/5'-H);  $\delta_C$ (100.63 MHz, CDCl<sub>3</sub>) 38.9 (d,  $J_{PC}$  7, CH<sub>2</sub>), 52.9 (d,  $J_{PC}$  6, POMe), 53.0 (d,  $J_{PC}$  6, POMe), 55.0 (d,  $J_{PC}$  6, POMe), 55.1 (d,  $J_{PC}$  6, POMe), 80.0 (d,  $J_{PC}$  199, C-1), 100.3 (d,  $J_{PC}$  17.5, C-3), 107.1 (dd,  $J_{PC}$  10.2 and 9.8, C-4), 126.9 (C-4'), 128.6, (x2)(C-3'/5'), 129.1 (x2)(C-2'/6'), 137.7 (dd,  $J_{PC}$  5.3 and 5.1, C-5), 137.7 (d,  $J_{PC}$  4, C-1') and 215.7 (d,  $J_{PC}$  3, C-2).

*Dimethyl 4-benzyl-5-(dimethoxyphosphorylmethyl)furan-2-ylphosphonate 25*;  $\delta_P$ (109.3 MHz, CDCl<sub>3</sub>) 7.6, (d,  $J_{PP}$  4) and 25.1 (d,  $J_{PP}$  4);  $\delta_H$ (400 MHz, CDCl<sub>3</sub>) 3.26 (2 H, d,  $J_{PH}$  21, PCH<sub>2</sub>), 3.72 (6 H, d,  $J_{PH}$  11.0, POMe), 3.77 (6 H, d,  $J_{PH}$  11.4, POMe), 3.78 (2 H, br d,  $J$  2, CH<sub>2</sub>), 6.95 (1 H, m, 3-H), 7.17 (2 H, dm,  $J_{HH}$  7.5, 2'/6'-H), 7.22 (1 H, tt,  $J_{HH}$  7.5 and 1.3, 4'-H) and 7.30 (2 H, tt,  $J_{HH}$  7.5 and 1.3, 3'/5'-H);  $\delta_C$ (100.63 MHz, CDCl<sub>3</sub>) 25.0 (d,  $J_{PC}$  143, PCH<sub>2</sub>), 30.8 (d,  $J_{PC}$  2, CH<sub>2</sub>Ph), 53.1 (d,  $J_{PC}$  7, POMe), 53.4 (d,  $J_{PC}$  6, POMe), 122.8 (dd,  $J_{PC}$  11 and 9, C-4), 126.4 (dd,  $J_{PC}$  24 and 4, C-3), 126.6 (C-4'), 128.7 (x2)(C-3'/5'), 128.8 (x2)(C-2'/6'), 139.1 (s, C-1'), 141.6 (dd,  $J_{PC}$  245 and 4, C-2) and 147.9 (dd,  $J_{PC}$  13 and 10, C-5).

### X-Ray crystallography

Data were collected at 120 K using a Nonius Kappa CCD area detector diffractometer mounted at the window of a molybdenum rotating anode (50 KV, 90 mA,  $\lambda=0.71069$  Å). The crystal-to-detector distance was 30 mm and  $\phi$  and  $\Omega$  scans (1.0° increments, 20 s exposure time) were carried out to fill the Ewald sphere. Data collection and processing were carried out using COLLECT<sup>5</sup>, DENZO<sup>6</sup> and maXus<sup>7</sup> and an empirical absorption correction was applied using SORTAV.<sup>8</sup> The structure was solved by direct-method using SHELXS-97<sup>9</sup> and refined anisotropically (non-hydrogen atoms) by full-matrix least-squares on  $F^2$  using the SHELXL-97<sup>9</sup> program. The H atoms were calculated geometrically and refined with a riding model.

**Crystal data.** C<sub>13</sub>H<sub>13</sub>N<sub>4</sub>O<sub>7</sub>P,  $M = 368.24$ , triclinic,  $a = 8.2246(2)$ ,  $b = 8.6176(2)$ ,  $c = 11.5999(3)$  Å,  $U = 767.27(3)$  Å<sup>3</sup>,  $T = 120(2)$  K, space group  $P 1$  (no. 2),  $Z = 2$ ,  $\mu(\text{Mo-K}\alpha) = 0.228$  mm<sup>-1</sup>, 14406 reflections measured, 3510 unique ( $R_{int} = 0.0321$ ) which were used in all calculations. The final  $wR(F^2)$  was 0.1213 (all data).

### Notes and references

- 1 K. S. Feldman, J. C. Saunders and M. L. Wroblewski, *J. Org. Chem.*, 2002, **67**, 7096.
- 2 Ammonium acetate used as the buffer.
- 3 Care – higher temperatures can cause charring and decomposition.
- 4 Signal partially obscured.
- 5 Data collection software, R. Hooft, Nonius B.V., 1998.
- 6 Z. Otwinowski and W. Minor, in *Methods in Enzymology*, ed. C.W. Carter, Jr and R.M. Sweet, Academic Press, New York, 1997, vol. 276, part A, p. 307.
- 7 S. Mackay, C.J. Gilmore, C. Edwards, M. Tremayne, N. Stewart, K. Shankland. maXus: a computer program for the solution and refinement of crystal structures from diffraction data; University of Glasgow; Glasgow, U.K., Nonius BV, Delft, The Netherlands and MacScience Co. Ltd., Yokohama, Japan, 1998.
- 8 R.H. Blessing, *Acta Cryst.*, 1995, **A51**, 33 and *J. Appl. Cryst.*, 1997, **30**, 421.
- 9 G. M. Sheldrick, SHELX-97, Release 97–2, Univ. Göttingen, Germany, 1998.
